# Supplementary material for: Partial volume correction for quantitative CEST imaging of acute ischemic stroke
Source: PubMed Central journal article supplement (PMC6771886; doi:10.1002/mrm.27872), 2019-06-14
Supplement: MRM-82-1920-s001.pdf [file MRM-82-1920-s001.pdf]

# Supporting Information

**Supporting Information Table S1:** CSF pool priors expressed as a mean and SD. Glossary –  $M_0$ : pool concentration relative to water pool (water pool  $M_0$  is absolute),  $k_{ex}$ : pool→bulk water exchange rate,  $T_1$ : longitudinal relaxation time,  $T_2$ : transverse relaxation time,  $\Delta\omega$ : chemical shift with respect to water pool. <sup>†</sup> Based on ref. (1), <sup>‡</sup> Based on ref. (2)

| Parameter            | CSF pool of the PV correction model |                    |
|----------------------|-------------------------------------|--------------------|
|                      | mean                                | SD                 |
| $M_0$ (norm.)        | $0.527 \times M_0^{tissue}$         | $1 \times 10^{-6}$ |
| $k_{ex}$ (Hz)        | —                                   | —                  |
| $T_1$ (s)            | $1.9^{\dagger}$                     | 0.15               |
| $T_2$ (ms)           | $250^{\ddagger}$                    | 50                 |
| $\Delta\omega$ (ppm) | 0                                   | $1 \times 10^{-6}$ |

## REFERENCES

- [1] Hashemi R. H., Bradley W. G., Listanti C. J.. *Magnetic Resonance Imaging: The Basics*. Philadelphia, USA: Lippincott Williams & Wilkins 3 ed. 2010.
- [2] Carneiro A. A. O., Vilela G. R., Araujo D. B. de, Baffa O.. MRI Relaxometry: Methods and Applications *Brazilian Journal of Physics*. 2006;36:9–15.
